# Supplementary material for: A fatal yellow fever virus infection in China: description and lessons
Source: PubMed Central journal article supplement (PMC5141266; doi:10.1038/emi.2016.89), 2016-07-13
Supplement: emi201689x1.pdf [file emi201689x1.pdf]

**Supplementary Table S1** Clinical symptoms and treatments of the patient during the disease progression

| <b>symptoms</b>                     | Day3    | Day 4   | Day 5  | Day6   | Day 7  | Day 8  | Day9    |
|-------------------------------------|---------|---------|--------|--------|--------|--------|---------|
| Body temperature (°C)               | 36.1    | 37      | 36.5   | 36.2   | 36.8   | 37.1   | 36.4    |
| Heart rate (times/min)              | 74      | 76      | 79     | 60     | 70     | 101    | 113     |
| Blood pressure (mmHg)               | 126/57  | 121/73  | 132/84 | 136/92 | 114/63 | 127/80 | 209/115 |
| Alimentary tract hemorrhage         | +       | +       | +      | +      | ++     | ++     | ++      |
| Petechiae, ecchymoses               | +       | ++      | +++    | +++    | +++    | +++    | +++     |
| epistaxis                           | -       | -       | -      | -      | +      | ++     | +       |
| Puncture bleeding                   | -       | +       | ++     | ++     | ++     | ++     | ++      |
| Haematemesis(ml)                    |         |         |        | 190    | 400    | -      | -       |
| Urine volume (ml)                   | 160/12h | 40/12h  | 98     | 36     | 70     | 78     | -       |
| Disturbance of consciousness        | -       | -       | +      | ++     | +++    | +++    | +++     |
| <b>Treatment</b>                    |         |         |        |        |        |        |         |
| Venous transfusion (ml)             | 1250    | 1898    | 2987   | 3110   | 6886   | 5884   | -       |
| Gastrointestinal decompression (ml) |         |         |        | 170    | 700    | 180    |         |
| Dehydrating amount of CRRT (ml)     |         | 390/12h | 3320   | 2630   | 400    | 3850   |         |
| Output quantity (ml)                | 160/12h | 430/12h | 3418   | 3026   | 1570   | 4105   |         |
| CRRT                                |         | Yes     | Yes    | Yes    | Yes    | Yes    | Yes     |
| plasmapheresis                      |         |         |        | Yes    | Yes    | Yes    |         |
| Blood transfusion                   |         |         | Yes    |        | Yes    | Yes    |         |
| Platelet transfusion                |         |         | Yes    | Yes    |        |        |         |
| Plasma transfusion                  |         | Yes     | Yes    |        |        | Yes    |         |
| IPPV.                               |         |         |        | Yes    | Yes    | Yes    | Yes     |
| Coagulation factor VII              |         |         |        |        |        | Yes    |         |
| Cefmetazole 1g qd                   | Yes     | Yes     | Yes    | Yes    | Yes    | Yes    |         |
| Meropenem 1g q12h                   |         |         | Yes    | Yes    | Yes    | Yes    | Yes     |
| Vancomycin 0.5g qd                  |         |         | Yes    | Yes    | Yes    | Yes    | Yes     |
