# Supplementary material for: A fatal yellow fever virus infection in China: description and lessons
Source: PubMed Central journal article supplement (PMC5141266; doi:10.1038/emi.2016.89), 2016-07-13
Supplement: emi201689x2.pdf [file emi201689x2.pdf]

**Supplementary Table S2** The difference in amino acids sequence between the Yellow fever virus (CNFY01/2016) obtained in this study and the strain Angola71 collected in Angola in 1971.

| Gene | Position(aa) | Difference in aa<br>(Angogla71→CNFY01) |
|------|--------------|----------------------------------------|
| C    | 9            | K→R                                    |
|      | 96           | S→A                                    |
|      | 107          | L→M                                    |
|      | 108          | F→V                                    |
| NS2b | 1408         | K→R                                    |
| NS3  | 1603         | R→K                                    |
|      | 1835         | A→T                                    |
|      | 2225         | V→I                                    |
| NS4a | 2234         | T→S                                    |
| NS4b | 2505         | E→G                                    |
| NS5  | 2639         | V→I                                    |
|      | 2935         | Q→L                                    |
|      | 3018         | T→I                                    |
|      | 3032         | A→T                                    |
